# Supplementary material for: Antigen-Specific IFN-γ/IL-17-Co-Producing CD4+ T-Cells are the Determinants for Protective Efficacy of Tuberculosis Subunit Vaccine
Source: Vaccines (Basel). 2020 Jun 11;8(2):300. doi: 10.3390/vaccines8020300 (PMC7350228; doi:10.3390/vaccines8020300)
Supplement: Supplementary file 1 [file vaccines-08-00300-s001.pdf]

**Antigen-specific IFN- $\gamma$ /IL-17-co-producing CD4<sup>+</sup> T-cells are the determinants for protective efficacy of tuberculosis subunit vaccine**

Han-Gyu Choi<sup>1,3</sup>, Kee Woong Kwon<sup>2,3</sup>, Seunga Choi<sup>1</sup>, Yong Woo Back<sup>1</sup>, Hye-Soo Park<sup>1</sup>, Soon Myung Kang<sup>2</sup>, Eunsol Choi<sup>2</sup>, Sung Jae Shin<sup>2\*</sup> & Hwa-Jung Kim<sup>1\*</sup>

<sup>1</sup>Department of Microbiology, and Medical Science, College of Medicine, Chungnam National University, Daejeon, Republic of Korea

<sup>2</sup>Department of Microbiology, Institute for Immunology and Immunological Diseases, Brain Korea 21 PLUS Project for Medical Science, Yonsei University College of Medicine, Seoul, Republic of Korea

<sup>3</sup>These authors contributed equally.

\*Corresponding authors

Hwa-Jung Kim, email: [hjukim@cnu.ac.kr](mailto:hjukim@cnu.ac.kr),

Sung Jae Shin, email: [sjshin@yuhs.ac](mailto:sjshin@yuhs.ac)

## Supplementary Information

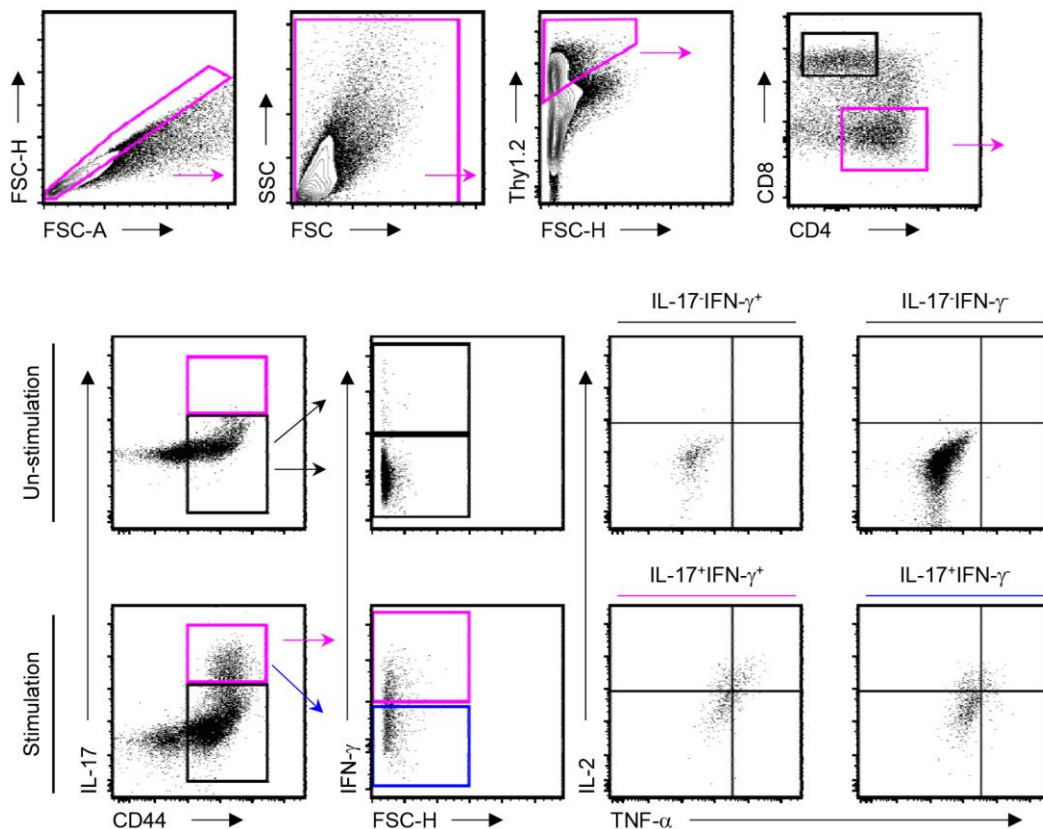

**Supplementary Fig. 1.** Gating strategy for the assessment of intracellular cytokines. All samples stained for surface and intracellular cytokines were gated based on forward scatter (FSC) and side scatter (SSC). T-cells were gated from lymphocytes by FSC vs. SSC on the basis of Thy1.2/CD4 expression for CD4<sup>+</sup> T-cells. To distinguish multifunctional T-cell subsets, gates indicating positive staining for each cytokine (IFN-γ, IL-2, IL-17A, and TNF-α) were delineated using the unstimulated control to determine background staining. ~~Using a Thy1.2<sup>+</sup>CD4<sup>+</sup> T-cell gate, specific staining for IFN-γ, IL-2, IL-17A, and TNF-α are shown for isotype control and stimulated spleen and lung cells.~~

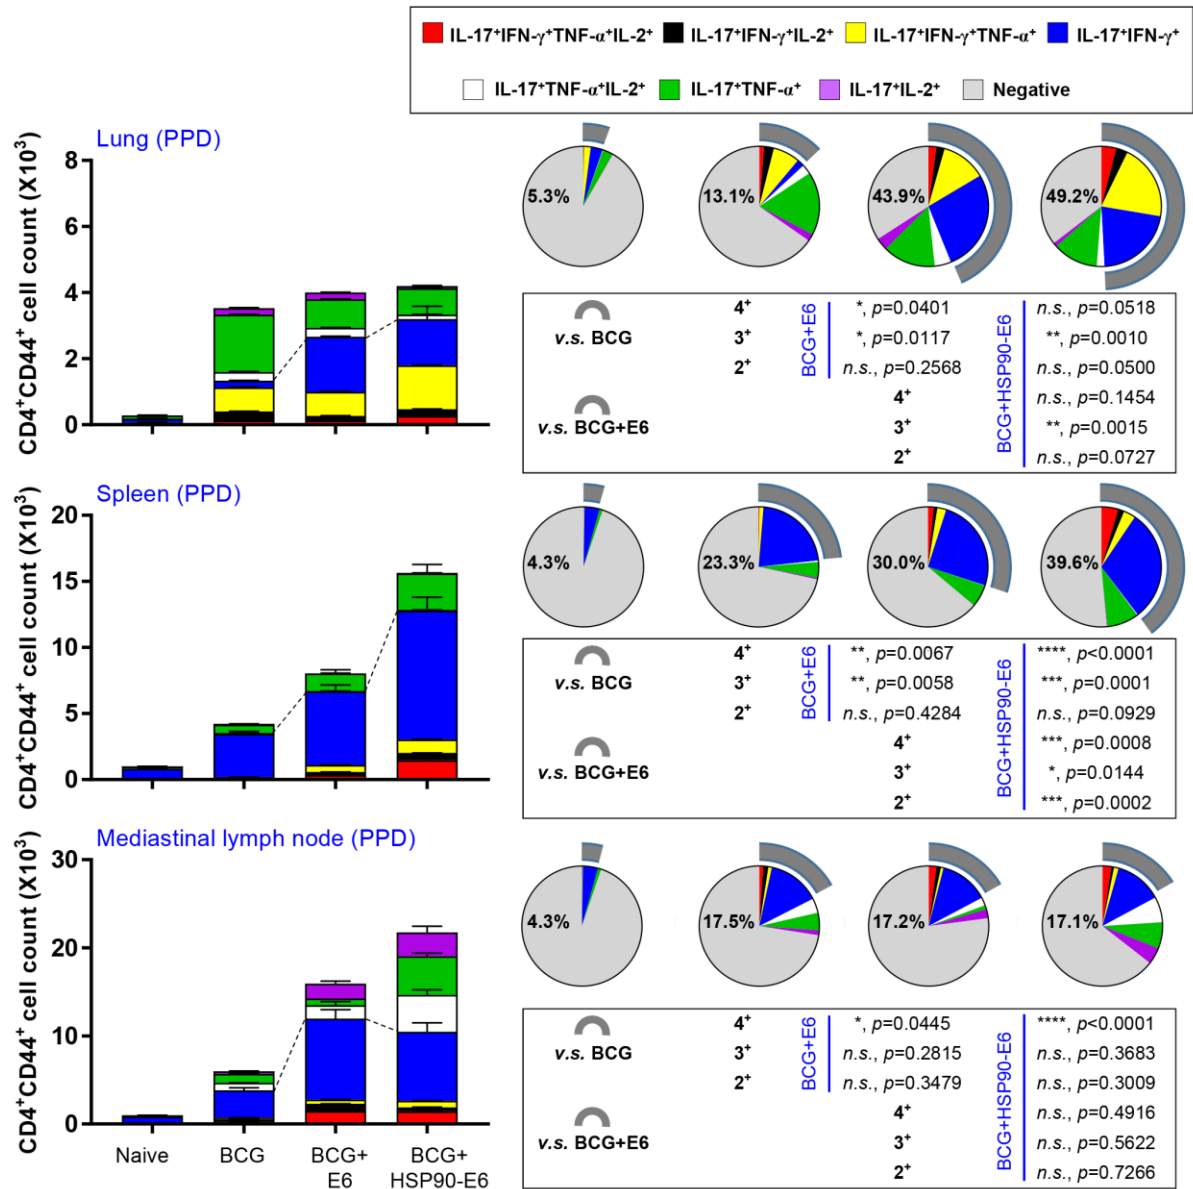

**Supplementary Fig. 2.** Ag-specific multifunctional T-cells are induced in the lungs, spleen, and lymph nodes in BCG+HSP90-E6-immunised mice. Mice were immunised and euthanised as described in the Methods section. Four weeks after the last immunisation, the mice were sacrificed and lung, spleen, and lymph-node cells collected from the mice were treated with PPD (2  $\mu$ g/ml) at 37°C for 12 h in the presence of GolgiStop. Upon stimulation with PPD, cell counts of Ag-specific, multifunctional CD4<sup>+</sup>CD44<sup>+</sup> T-cells producing IFN- $\gamma$ , IL-17, and/or TNF- $\alpha$ , IL-2 in lung, spleen, and lymph-node cells from each immunised group were determined by flow cytometry. Gray arc denotes the percentage of cytokine-positive T-cells

(IL-17<sup>+</sup>IFN- $\gamma$ <sup>+</sup>TNF- $\alpha$ <sup>+</sup>IL-2<sup>+</sup>-, IL-17<sup>+</sup>IFN- $\gamma$ <sup>+</sup>IL-2<sup>+</sup>-, IL-17<sup>+</sup>IFN- $\gamma$ <sup>+</sup>TNF- $\alpha$ <sup>+</sup>-, and IL-17<sup>+</sup>IFN- $\gamma$ <sup>+</sup>-CD4<sup>+</sup>CD44<sup>+</sup> T-cells). 2<sup>+</sup> stands for sum percentages of double-cytokine positive T-cells (IL-17<sup>+</sup>IFN- $\gamma$ <sup>+</sup>, IL-17<sup>+</sup>TNF- $\alpha$ <sup>+</sup>, and IL-17<sup>+</sup>IL-2<sup>+</sup>), 3<sup>+</sup> stands for triple-cytokine positive T-cells (IL-17<sup>+</sup>IFN- $\gamma$ <sup>+</sup>IL-2<sup>+</sup>, IL-17<sup>+</sup>IFN- $\gamma$ <sup>+</sup>TNF- $\alpha$ <sup>+</sup> and IL-17<sup>+</sup>TNF- $\alpha$ <sup>+</sup>IL-2<sup>+</sup>), and 4<sup>+</sup> stands for quadruple-cytokine positive T-cells (IL-17<sup>+</sup>IFN- $\gamma$ <sup>+</sup>TNF- $\alpha$ <sup>+</sup>IL-2<sup>+</sup>). Data are the mean  $\pm$  SD for 5 mice from each group. *n.s.*: not significant, \**p* < 0.05, \*\**p* < 0.01, \*\*\**p* < 0.001 and \*\*\*\**p* < 0.0001 compared to BCG-immunised mice. *n.s.*: not significant, \*\**p* < 0.01 and \*\*\**p* < 0.001 between BCG+ESAT-6- and BCG+HSP90-E6-immunised mice.

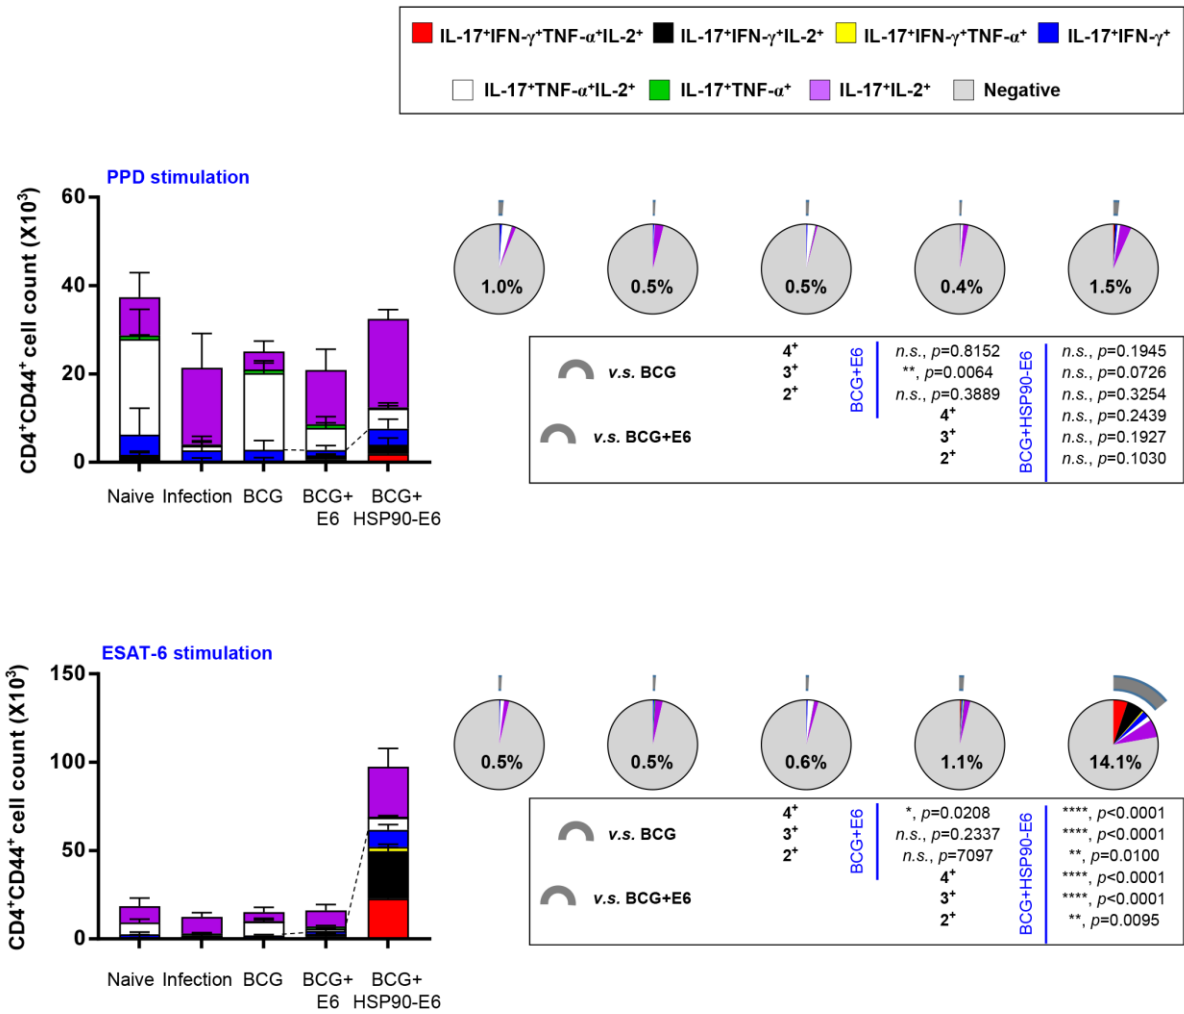

**Supplementary Fig. 3.** Induction of Ag-specific multifunctional T-cells is accompanied with the production of Th1/Th17-related cytokines after challenge with Mtb HN878. Mice in each group were sacrificed 10 weeks post-infection, and spleen cells were treated ESAT-6 (2  $\mu$ g/ml) at 37°C for 12 h in the presence of GolgiStop. Upon stimulation with ESAT-6, cell counts of Ag-specific, multifunctional CD4<sup>+</sup>CD44<sup>+</sup> T-cells producing IFN- $\gamma$ , IL-17 and/or TNF- $\alpha$  and IL-2 in spleen cells from each immunised group were determined by flow cytometry. Gray arc denotes the percentage of cytokine-positive T-cells (IL-17<sup>+</sup>IFN- $\gamma$ <sup>+</sup>TNF- $\alpha$ <sup>+</sup>IL-2<sup>+</sup>-, IL-17<sup>+</sup>IFN- $\gamma$ <sup>+</sup>IL-2<sup>+</sup>-, IL-17<sup>+</sup>IFN- $\gamma$ <sup>+</sup>TNF- $\alpha$ <sup>+</sup>-, and IL-17<sup>+</sup>IFN- $\gamma$ <sup>+</sup>-CD4<sup>+</sup>CD44<sup>+</sup> T-cells). 2<sup>+</sup> stands for sum percentages of double-cytokine positive T-cells (IL-17<sup>+</sup>IFN- $\gamma$ <sup>+</sup>, IL-17<sup>+</sup>TNF- $\alpha$ <sup>+</sup>, and IL-17<sup>+</sup>IL-2<sup>+</sup>), 3<sup>+</sup> stands for triple-cytokine positive T-cells (IL-17<sup>+</sup>IFN- $\gamma$ <sup>+</sup>IL-2<sup>+</sup>, IL-17<sup>+</sup>IFN- $\gamma$ <sup>+</sup>TNF- $\alpha$ <sup>+</sup>

1 and IL-17<sup>+</sup>TNF- $\alpha$ <sup>+</sup>IL-2<sup>+</sup>), and 4<sup>+</sup> stands for quadruple-cytokine positive T-cells (IL-17<sup>+</sup>IFN-  
2  $\gamma$ <sup>+</sup>TNF- $\alpha$ <sup>+</sup>IL-2<sup>+</sup>). Data the mean  $\pm$  SD for 7 mice from each group. *n.s.*: not significant, \**p* <  
3 0.05, \*\**p* < 0.01 and \*\*\*\**p* < 0.0001 compared to BCG-immunised mice. *n.s.*: not significant,  
4 \*\**p* < 0.01 and \*\*\*\**p* < 0.0001 between BCG+ESAT-6- and BCG+HSP90-E6-immunised  
5 mice.

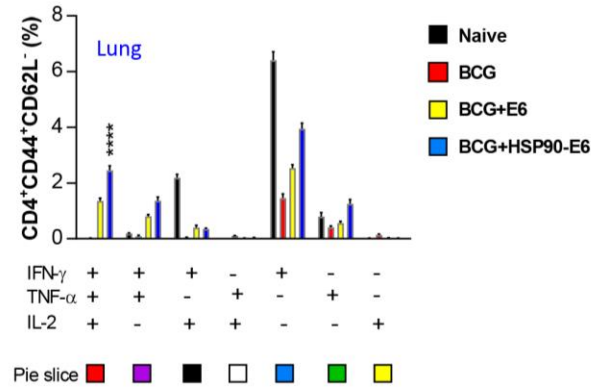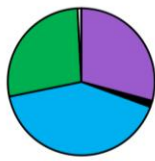

**Naive**

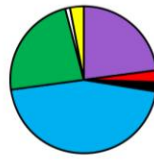

**BCG**

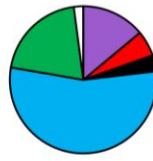

**BCG+E6**

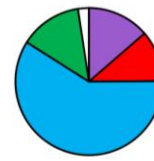

**BCG+HSP90-E6**

**Supplementary Fig. 4.** Ag-specific multifunctional T-cells are induced in the lungs in BCG+HSP90-E6-immunised mice. Mice were immunised and euthanised as described in the Methods section. Four weeks after the last immunisation, mice were sacrificed, and lungs cells were treated with ESAT-6 (2  $\mu$ g/ml) at 37 °C for 12 h in the presence of GolgiStop. Upon stimulation with PPD, cell counts of Ag-specific, multifunctional CD4<sup>+</sup>CD44<sup>+</sup> T-cells producing IFN- $\gamma$  and/or TNF- $\alpha$  and IL-2 in the lung cells from each immunised group were determined by flow cytometry. Data are the mean  $\pm$  SD for 5 mice from each group. \*\*\*\* $p$  < 0.0001 compared to BCG-immunised mice.

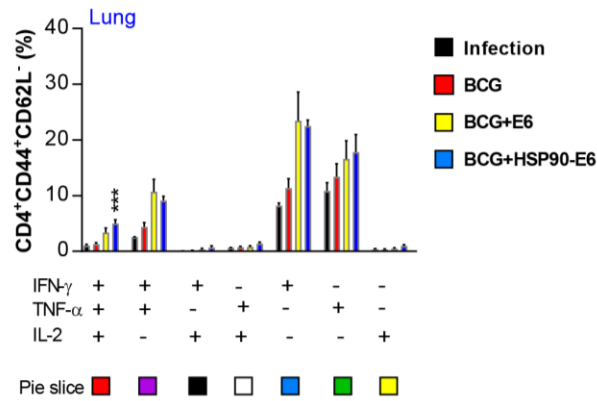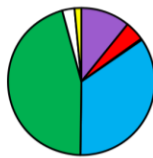

**Infection**

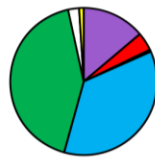

**BCG**

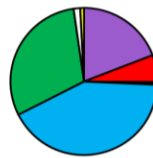

**BCG+E6**

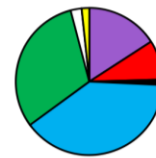

**BCG+HSP90-E6**

**Supplementary Fig. 5.** Induction of Ag-specific multifunctional T-cells accompanied with the production cytokines after challenge with Mtb HN878. Mice in each treatment group were sacrificed 10 weeks post-infection, and lung cells were treated with ESAT-6 (2  $\mu$ g/ml) at 37°C for 12 h in the presence of GolgiStop. Upon stimulation with ESAT-6, cell counts of Ag-specific, multifunctional CD4<sup>+</sup>CD44<sup>+</sup> T-cells producing IFN- $\gamma$  and/or TNF- $\alpha$  and IL-2 in the lung cells from each immunised group were determined by flow cytometry. Data are the mean  $\pm$  SD for 7 mice from each group. \*\*\* $p$  < 0.001 compared to BCG-immunised mice.

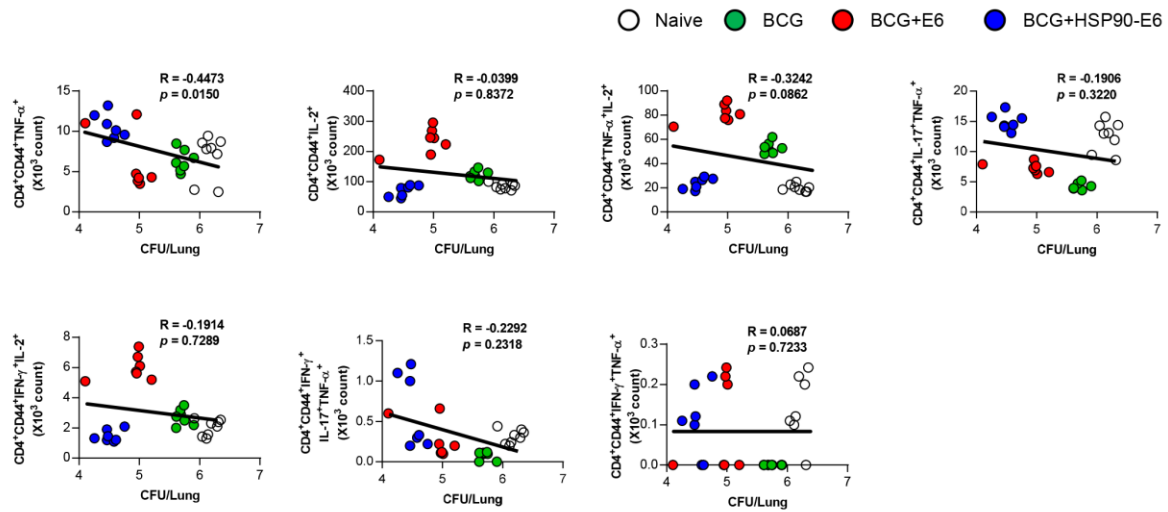

**Supplementary Fig. 6.** The protective correlation of protection with pre-infection driven immune response in the vaccinated and challenged mice. Relationship between protection (CFU) and ESAT-6 specific various cytokine combination in CD4<sup>+</sup>CD44<sup>+</sup> T-cells is shown as a fitted regression line with the correlation coefficient. Spearman's r and P values of the correlations are indicated. White circle: Naïve, green circle: BCG, red circle: BCG+E6, and blue circle: BCG+HSP90-E6.

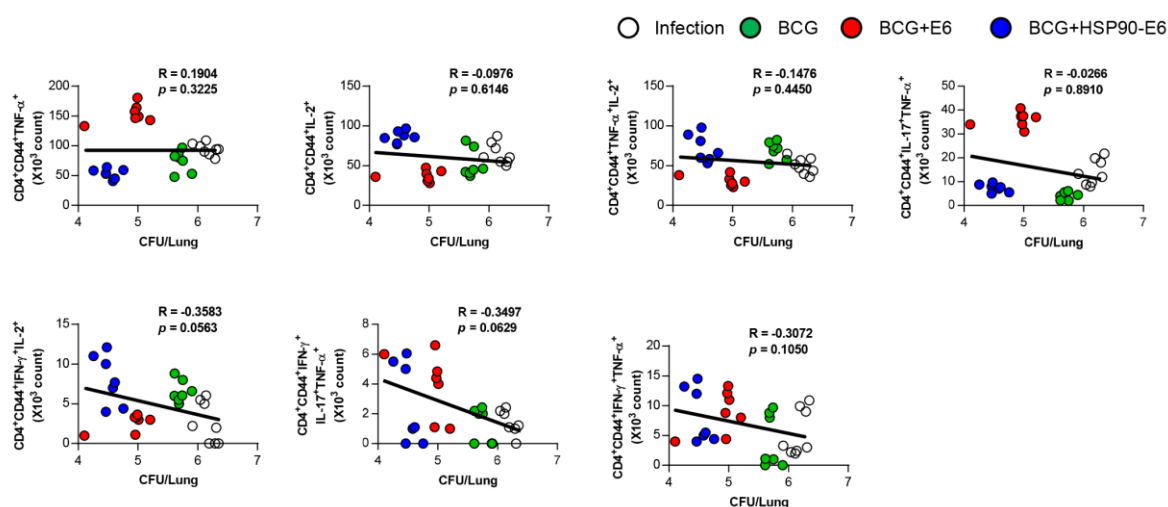

**Supplementary Fig. 7.** The protective correlation of protection with post-infection driven immune response in the vaccinated and challenged mice. Relationship between protection (CFU) and ESAT-6 specific various cytokine combination in CD4<sup>+</sup>CD44<sup>+</sup> T-cells is shown as a fitted regression line with the correlation coefficient. Spearman's r and P values of the correlations are indicated. White circle: Infection, green circle: BCG, red circle: BCG+E6, and blue circle: BCG+HSP90-E6.

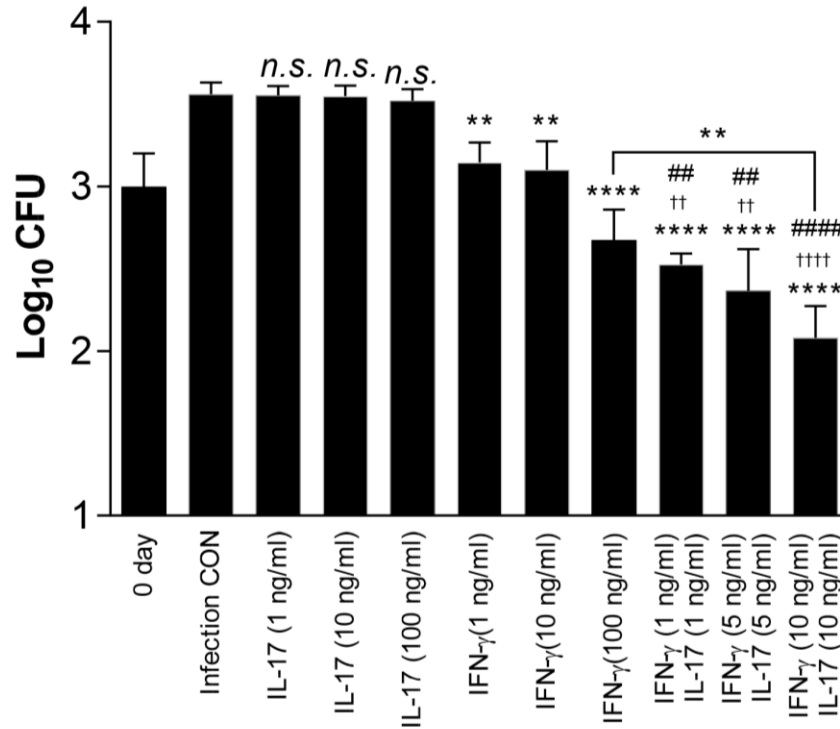

**Supplementary Fig. 8.** IFN- $\gamma$ /IL-17 inhibits intracellular bacterial growth in Mtb-infected macrophages. Mtb-infected BMDMs were treated with IFN- $\gamma$  (1 - 100 ng/ml), IL-17(1 - 100 ng/ml), or IFN- $\gamma$ /IL-17 (1 - 10 ng/ml each) for 3 days. Intracellular Mtb growth in BMDMs was determined at time point 0 and 3 days after cytokine treatment. Data are the mean  $\pm$  SD ( $n = 3$ ); \*\* $p < 0.01$ , or \*\*\*\* $p < 0.0001$  versus infection control, †† $p < 0.01$  or †††† $p < 0.0001$  for co-treated vs. IFN- $\gamma$ , ## $p < 0.01$  or ##### $p < 0.0001$  co-treated vs. IFN- $\gamma$  determined by one-way ANOVA. n.s.: no significant difference.

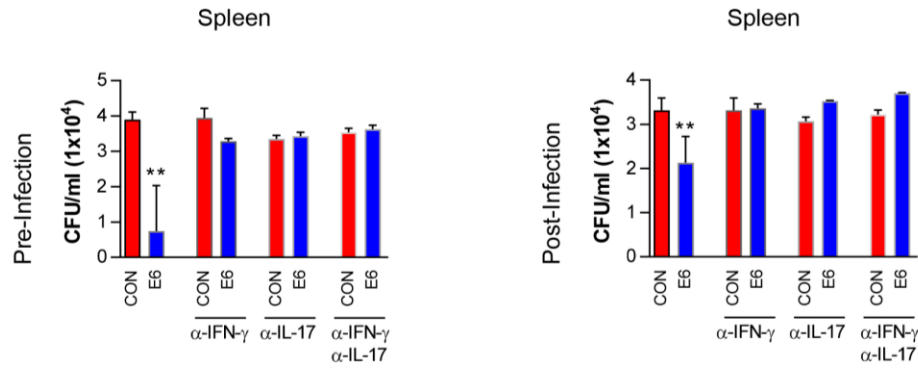

**Supplementary Fig. 9.** IFN- $\gamma$ /IL-17 from supernatants of spleen cells from HSP90-E6-vaccinated mice inhibit intracellular Mtb growth. Mtb-infected BMDMs were treated with supernatants of ESAT-6-re-stimulated spleen cells from BCG+HSP90-E6-vaccinated mice in the presence or absence of anti-IFN- $\gamma$  or anti-IL-17 for 3 days. Intracellular Mtb growth in BMDMs was determined on day 3. Data are the mean  $\pm$  SD ( $n = 3$ ); \*\* $p < 0.01$ , or \*\*\* $p < 0.001$ .

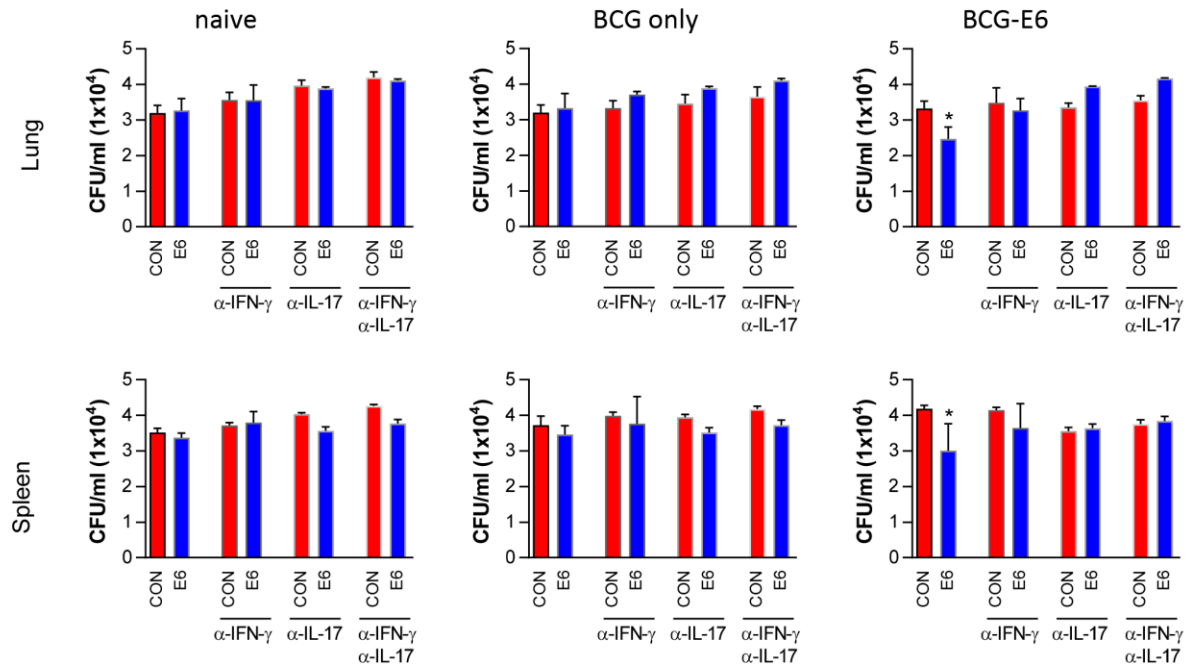

**Supplementary Fig. 10.** IFN- $\gamma$ /IL-17 from supernatants of lung and spleen cells from ESAT-6-vaccinated mice inhibit intracellular Mtb growth. Mtb-infected BMDMs were treated with supernatants of ESAT-6-re-stimulated lung and spleen cells from BCG+E6-vaccinated mice in the presence of absence of anti-IFN- $\gamma$  or anti-IL-17 for 3 days. Intracellular Mtb growth in BMDMs was determined on day 3. Data are the mean  $\pm$  SD ( $n = 3$ ); \* $p < 0.05$ . G1: naïve, G3: BCG, G4: BCG+E6.

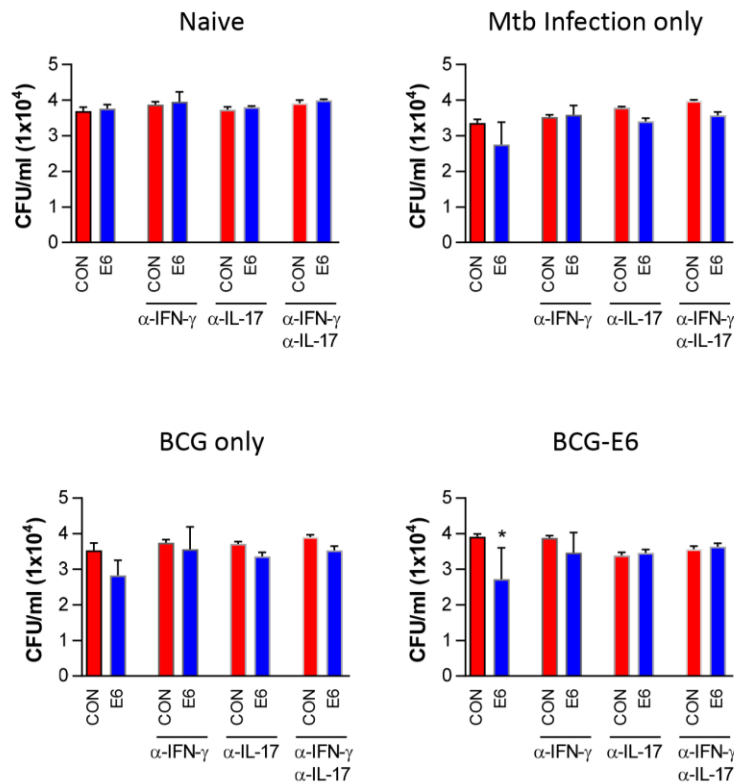

**Supplementary Fig. 11.** IFN- $\gamma$ /IL-17 from supernatants of lung cells from infected ESAT-6-vaccinated mice inhibit intracellular Mtb growth. Mtb-infected BMDMs were treated with supernatants of ESAT-6-re-stimulated lung cells from BCG+E6-vaccinated mice in the presence of absence of anti-IFN- $\gamma$  or anti-IL-17 for 3 days. Intracellular Mtb growth in BMDMs was determined on day 3. Data are the mean  $\pm$  SD ( $n = 3$ );  $*p < 0.05$ . G1: naïve, G2: infection, G3: BCG, G4: BCG+E6.

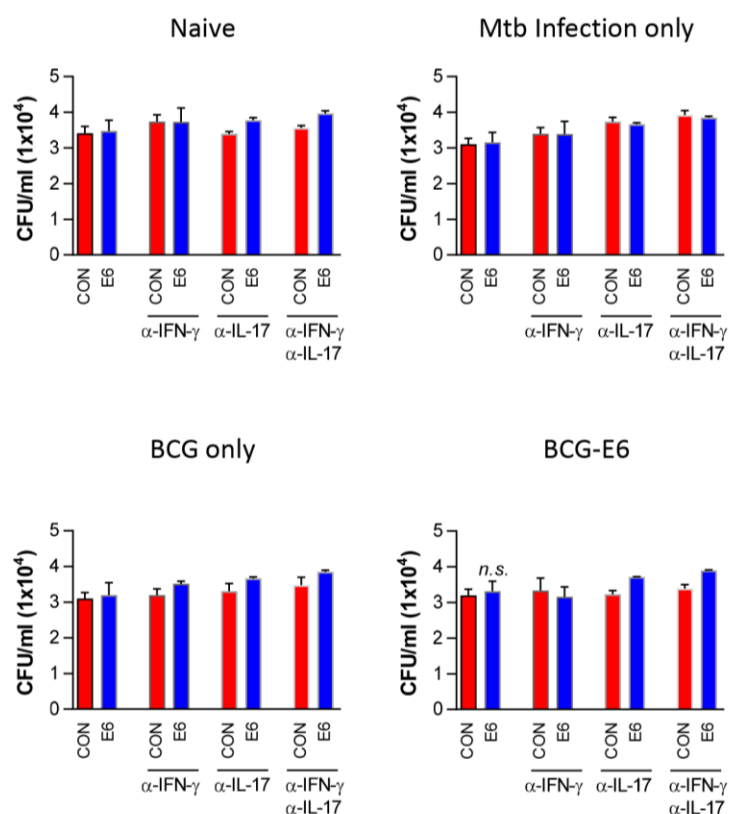

**Supplementary Fig. 12.** IFN- $\gamma$ /IL-17 from supernatants of spleen cells from infected ESAT-6-vaccinated mice inhibit intracellular Mtb growth. Mtb-infected BMDMs were treated with supernatants of ESAT-6-re-stimulated spleen cells from BCG+E6-vaccinated mice in the presence of absence of anti-IFN- $\gamma$  or anti-IL-17 for 3 days. Intracellular Mtb growth in BMDMs was determined on day 3. n.s.: no significant difference. G1: naïve, G2: infection, G3: BCG, G4: BCG+E6.

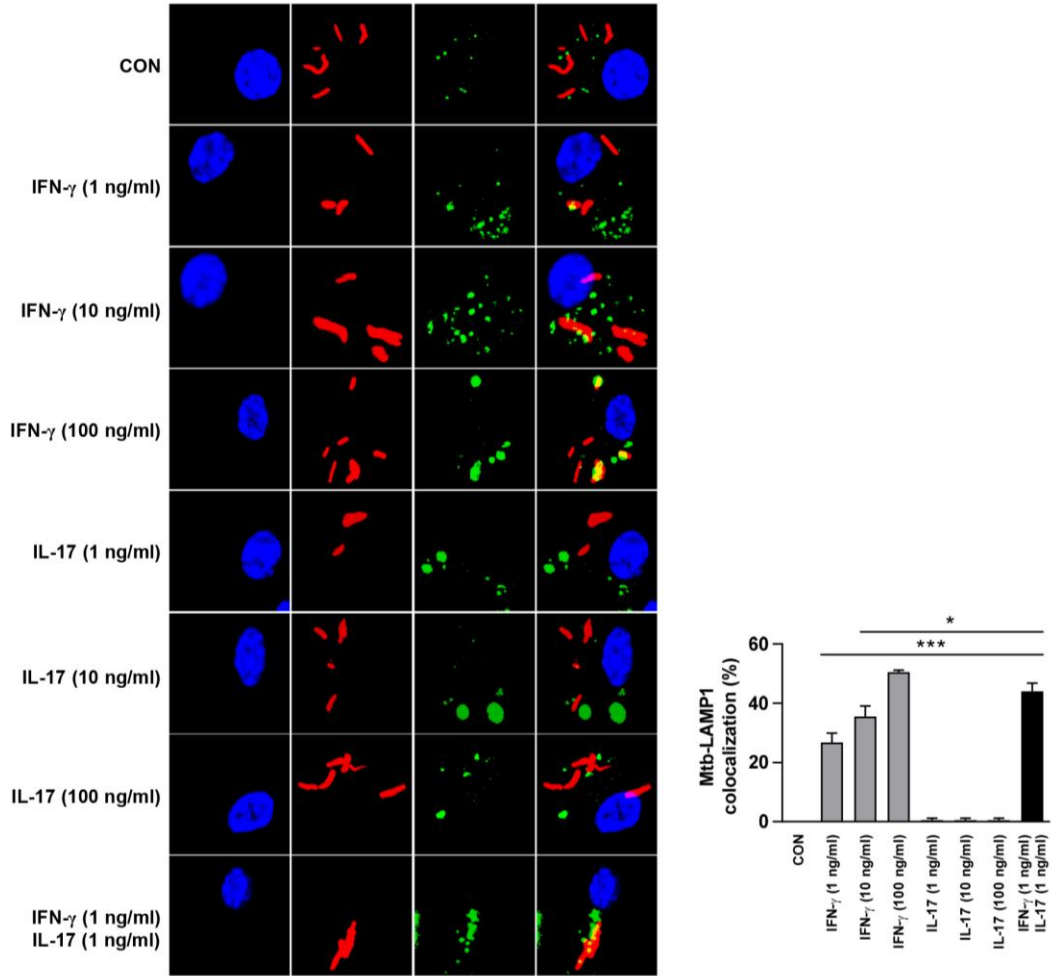

**Supplementary Fig. 13.** IFN- $\gamma$ /IL-17 induces phagosome-lysosome fusion in Mtb-infected macrophages. BMDMs were infected with Mtb-RFP (MOI = 1) for 4 h, washed, incubated with/without IFN- $\gamma$  (1 - 100 ng/ml), IL-17(1 - 100 ng/ml), or IFN- $\gamma$ /IL-17 (1 ng/ml each) for 72 h, fixed with 4% paraformaldehyde, and immunolabeled with anti-LAMP1 antibody and Alexa 488-conjugated goat anti-rabbit or anti-rat IgG (green). Nuclei were counterstained with DAPI (blue). The cells were analysed by laser-scanning confocal microscopy. Scale bar, 10  $\mu$ m. Quantification of Mtb-LAMP1 colocalisation is shown in the bar graph. Data are the mean  $\pm$  SD of 50–100 cells per experiment ( $n = 3$ ). \*\* $p < 0.01$  and \*\*\* $p < 0.001$  for treatment compared to infection-only controls (CON) or for difference between treatment data. *n.s.*, no significant difference.

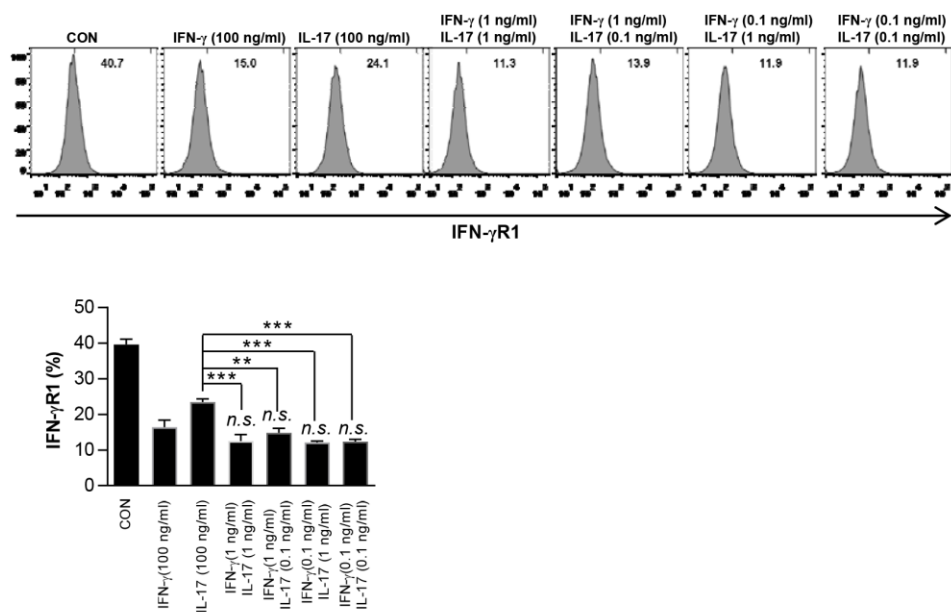

**Supplementary Fig. 14.** IFN- $\gamma$ /IL-17 does not affect IFN- $\gamma$ R1 in Mtb-infected macrophages. BMDMs were infected with Mtb (MOI = 1) for 4 h, washed, incubated with/without IFN- $\gamma$  (1 ng/ml), IL-17 (10 ng/ml), or IFN- $\gamma$ /IL-17 (1 ng/ml each) for 72 h, immunolabeled with anti-IFN- $\gamma$ R1 antibody, and analysed by flow cytometry. Data are the mean  $\pm$  SD ( $n = 5$ ); *n.s.*: not significant, \*\* $p < 0.01$  or \*\*\* $p < 0.0001$  versus infection control.

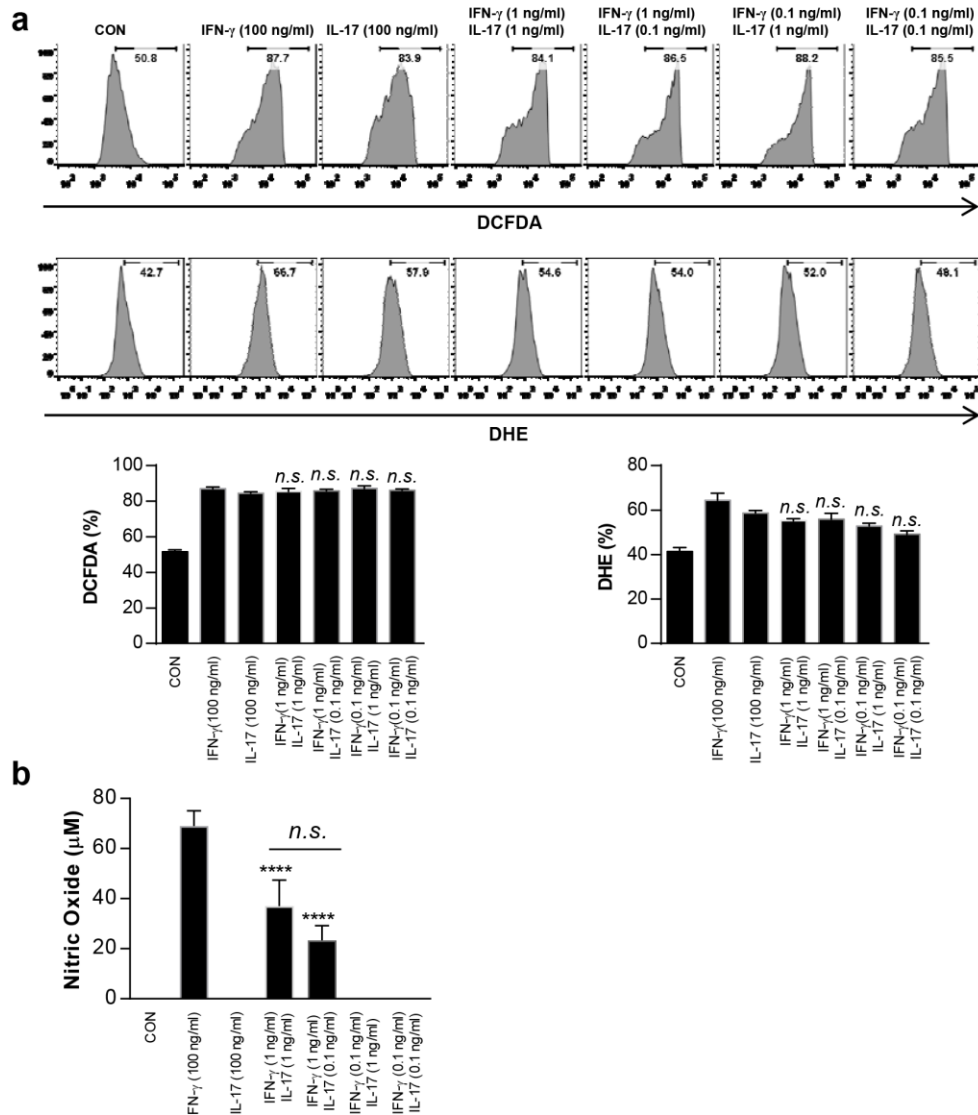

**Supplementary Fig. 15.** IFN- $\gamma$ /IL-17 does not affect ROS or NO production in Mtb-infected macrophages. **(a)** BMDMs were infected with Mtb (MOI = 1) for 4 h, washed, incubated with/without IFN- $\gamma$  (100 ng/ml), IL-17 (100 ng/ml), or IFN- $\gamma$ /IL-17 (1 – 0.1 ng/ml each) for 72 h, and immunolabeled with anti- DCFDA or DHE antibodies, and analysed using flow cytometry. Data are the mean  $\pm$  SD ( $n$  = 5); *n.s.*: not significant for IFN- $\gamma$ /IL-17-treated vs. IFN- $\gamma$  - or IL-17-treated cells, determined by one-way ANOVA. **(b)** NO production from culture supernatants were determined. Data are the mean  $\pm$  SD ( $n$  = 5); *n.s.*: not significant,

- 1 \*\*\*\* $p < 0.0001$  for IFN- $\gamma$ /IL-17-treated vs. IFN- $\gamma$ -treated cells, determined by one-way
- 2 ANOVA.
- 3

| Variables of cytokine in T cells |                                                                            | Pre-infection |                   | Variables of cytokine in T cells                                           |         | Post-infection    |         |
|----------------------------------|----------------------------------------------------------------------------|---------------|-------------------|----------------------------------------------------------------------------|---------|-------------------|---------|
|                                  |                                                                            | Spearman r    | P value           |                                                                            |         | Spearman r        | P value |
| Log <sub>10</sub> CFU in Lung    | IFN-γ <sup>+</sup> TNF-α <sup>+</sup> IL-2 <sup>+</sup> IL-17 <sup>+</sup> | -0.9082       | <i>P</i> < 0.0001 | IFN-γ <sup>+</sup> IL-17 <sup>+</sup>                                      | -0.7703 | <i>P</i> < 0.0001 |         |
|                                  | IFN-γ <sup>+</sup> IL-17 <sup>+</sup>                                      | -0.8641       | <i>P</i> < 0.0001 | IFN-γ <sup>+</sup> IL-2 <sup>+</sup> IL-17 <sup>+</sup>                    | -0.7133 | <i>P</i> < 0.0001 |         |
|                                  | IL-17 <sup>+</sup>                                                         | -0.8183       | <i>P</i> < 0.0001 | IFN-γ <sup>+</sup> TNF-α <sup>+</sup> IL-2 <sup>+</sup>                    | -0.6845 | <i>P</i> < 0.0001 |         |
|                                  | IFN-γ <sup>+</sup> TNF-α <sup>+</sup> IL-2 <sup>+</sup>                    | -0.6434       | <i>P</i> = 0.0002 | TNF-α <sup>+</sup> IL-2 <sup>+</sup> IL-17 <sup>+</sup>                    | -0.5829 | <i>P</i> = 0.0009 |         |
|                                  | IL-2 <sup>+</sup> IL-17 <sup>+</sup>                                       | -0.6333       | <i>P</i> = 0.0002 | IL-17 <sup>+</sup>                                                         | -0.5537 | <i>P</i> = 0.0018 |         |
|                                  | TNF-α <sup>+</sup>                                                         | -0.4473       | <i>P</i> = 0.0150 | IL-2 <sup>+</sup> IL-17 <sup>+</sup>                                       | -0.4168 | <i>P</i> = 0.0245 |         |
|                                  | TNF-α <sup>+</sup> IL-2 <sup>+</sup> IL-17 <sup>+</sup>                    | -0.3242       | <i>P</i> = 0.0862 | IFN-γ <sup>+</sup> IL-2 <sup>+</sup>                                       | -0.3583 | <i>P</i> = 0.0563 |         |
|                                  | TNF-α <sup>+</sup> IL-2 <sup>+</sup>                                       | -0.3242       | <i>P</i> = 0.0862 | IFN-γ <sup>+</sup> TNF-α <sup>+</sup> IL-17 <sup>+</sup>                   | -0.3497 | <i>P</i> = 0.0629 |         |
|                                  | IFN-γ <sup>+</sup> TNF-α <sup>+</sup> IL-17 <sup>+</sup>                   | -0.2292       | <i>P</i> = 0.2318 | IFN-γ <sup>+</sup> TNF-α <sup>+</sup>                                      | -0.3072 | <i>P</i> = 0.1050 |         |
|                                  | IFN-γ <sup>+</sup> IL-2 <sup>+</sup>                                       | -0.1914       | <i>P</i> = 0.7289 | IFN-γ <sup>+</sup> TNF-α <sup>+</sup> IL-2 <sup>+</sup> IL-17 <sup>+</sup> | -0.1933 | <i>P</i> = 0.3150 |         |
|                                  | TNF-α <sup>+</sup> IL-17 <sup>+</sup>                                      | -0.1906       | <i>P</i> = 0.3220 | TNF-α <sup>+</sup> IL-2 <sup>+</sup>                                       | -0.1476 | <i>P</i> = 0.4450 |         |
|                                  | IFN-γ <sup>+</sup>                                                         | -0.0676       | <i>P</i> = 0.726  | IL-2 <sup>+</sup>                                                          | -0.0976 | <i>P</i> = 0.6146 |         |
|                                  | IL-2 <sup>+</sup>                                                          | -0.0399       | <i>P</i> = 0.8372 | TNF-α <sup>+</sup> IL-17 <sup>+</sup>                                      | -0.0266 | <i>P</i> = 0.8910 |         |
|                                  | IFN-γ <sup>+</sup> IL-2 <sup>+</sup> IL-17 <sup>+</sup>                    | -0.0309       | <i>P</i> = 0.8735 | TNF-α <sup>+</sup>                                                         | 0.1904  | <i>P</i> = 0.3225 |         |
|                                  | IFN-γ <sup>+</sup> TNF-α <sup>+</sup>                                      | 0.0687        | <i>P</i> = 0.7233 | IFN-γ <sup>+</sup>                                                         | 0.6789  | <i>P</i> < 0.0001 |         |

**Supplementary Table 1.** Correlations between protection level and vaccine-induced immune responses pre- and post-infection. Correlations between protection (CFU) and ESAT-6-specific T-cells are shown in the table. Spearman's *r* and *p* values of the correlations are indicated.
